# Supplementary material for: LC–MS-based serum metabolomics analysis for the screening and monitoring of colorectal cancer
Source: Frontiers journal article supplement (doi:10.3389/fonc.2023.1173424), 2023-06-28

**Figure S1** Assessment of QC samples.

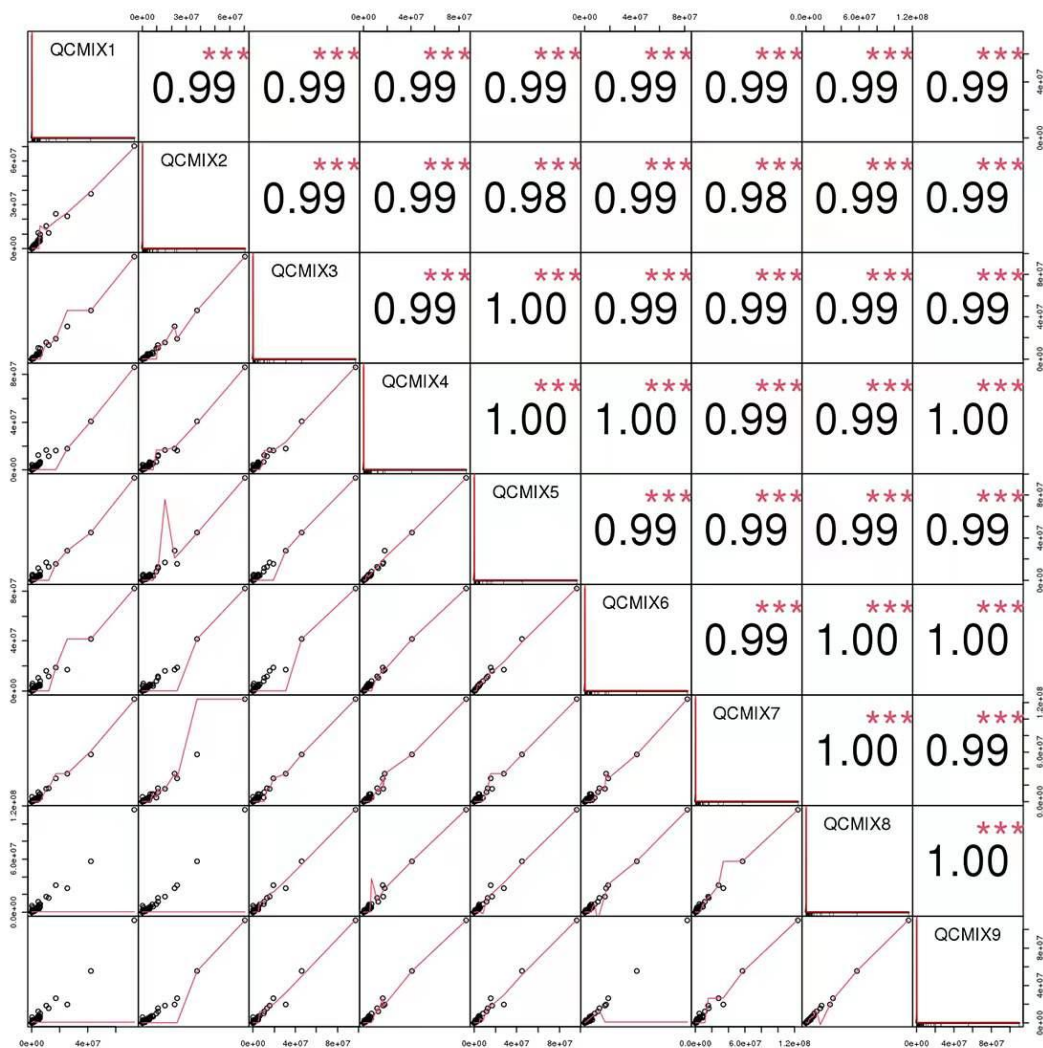

Figure S2 LC/MS serum chromatogram of QC sample

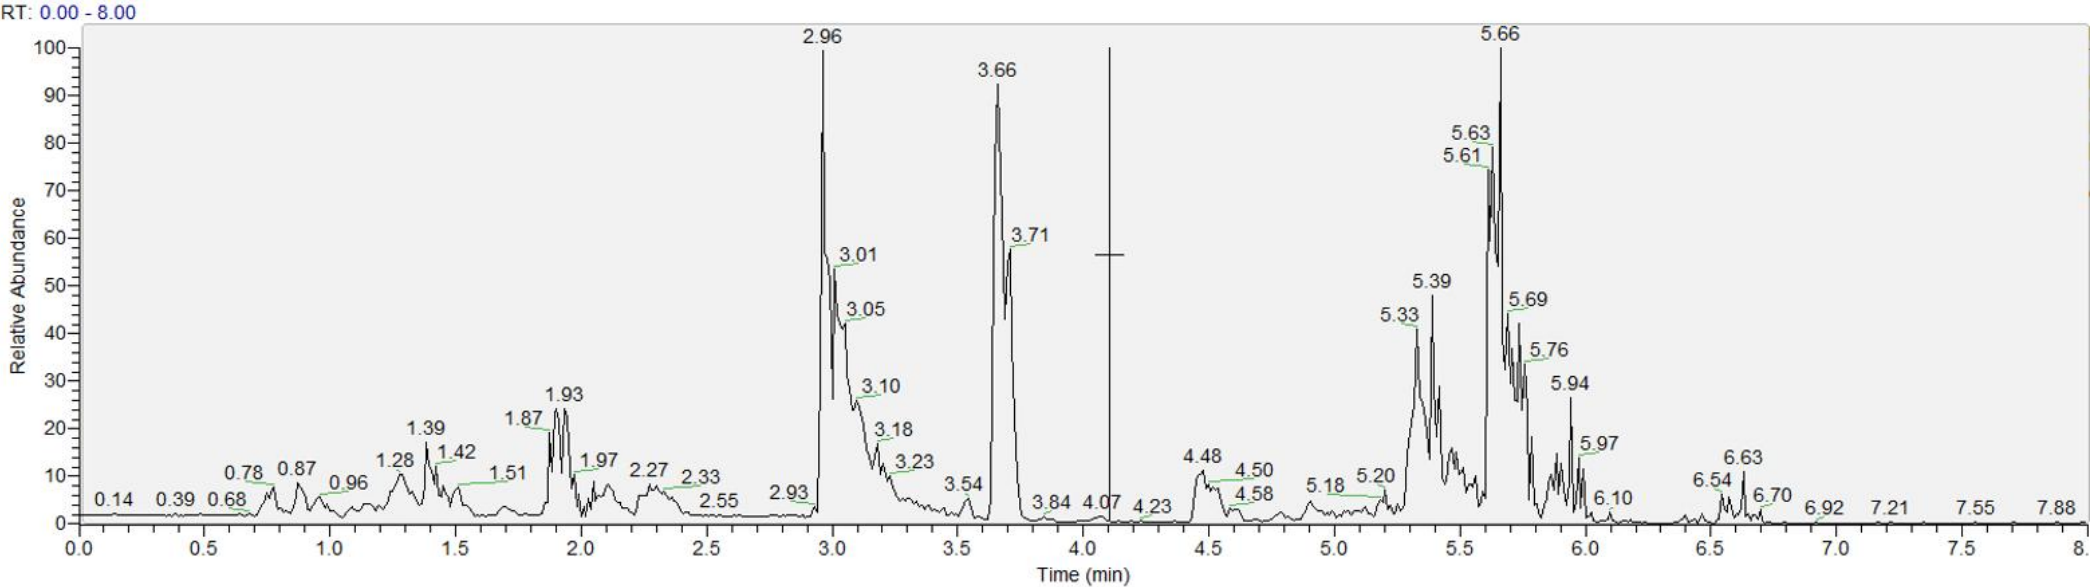

**Figure S3** Metabolic profiling variation. **(a)** Score plot of the unsupervised PCA model among the CRC and HC. **(b)** One hundred permutation tests of the OPLS-DA model based on CRC and HC serum metabolome.  $R^2=(0.0,0.815)$   $Q^2=(0.0,-0.421)$ .

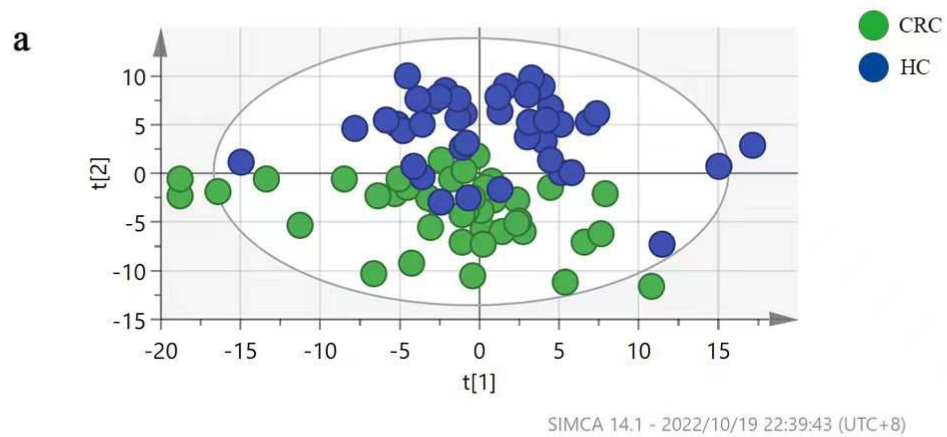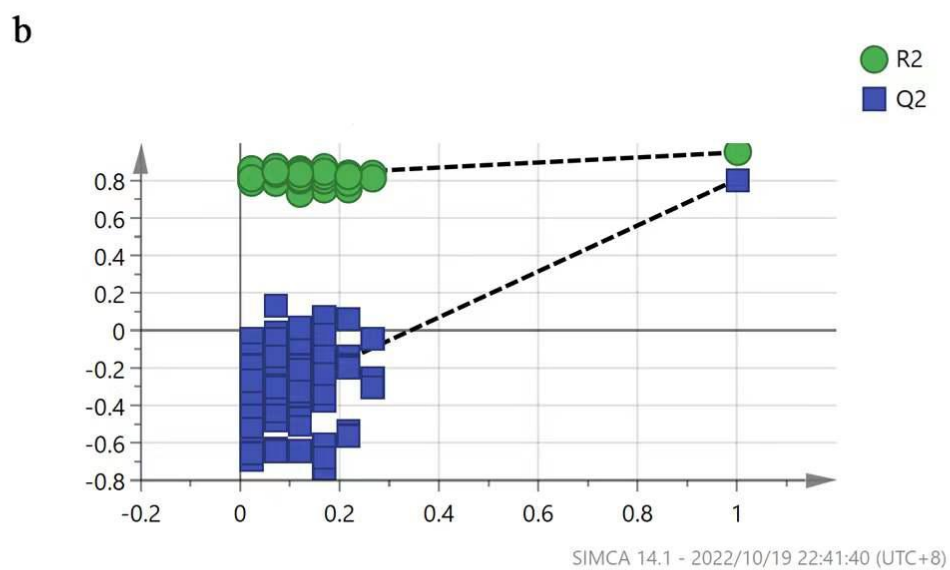

**Figure S4** Mass spectra of 9 metabolites

| Metabolite | Compound       | Compound ID | Adducts   | Formula    | Score | Fragmentation Score |
|------------|----------------|-------------|-----------|------------|-------|---------------------|
| Guanosine  | 2.69_283.0923n | HMDB0000133 | M+H, M+Na | C10H13N5O5 | 52    | 69.8                |

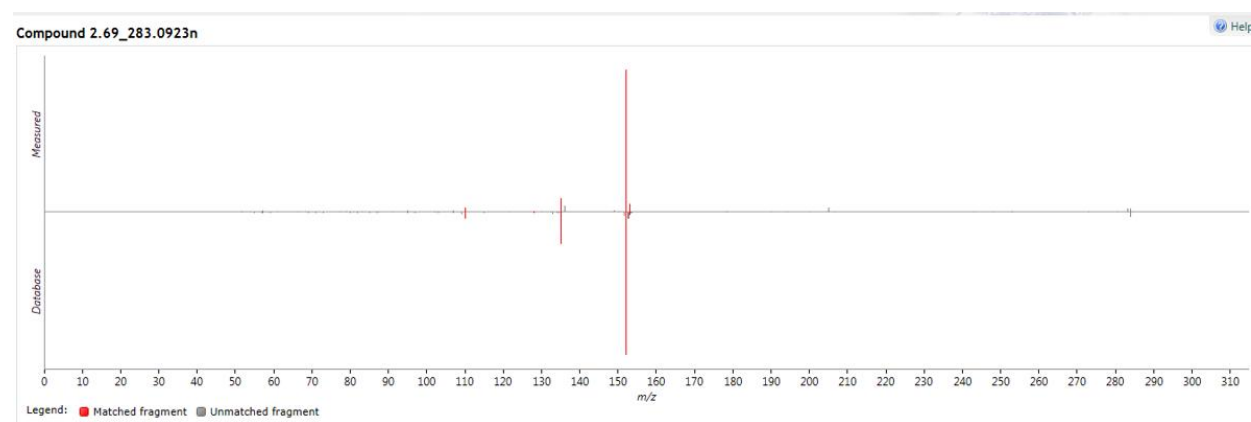

| Metabolite       | Compound         | Compound ID | Adducts | Formula | Score | Fragmentation Score |
|------------------|------------------|-------------|---------|---------|-------|---------------------|
| 2-Hydroxyadenine | 2.69_152.0569m/z | HMDB0000403 | M+H     | C5H5N5O | 42.7  | 18.6                |

Compound 2.69\_152.0569m/z

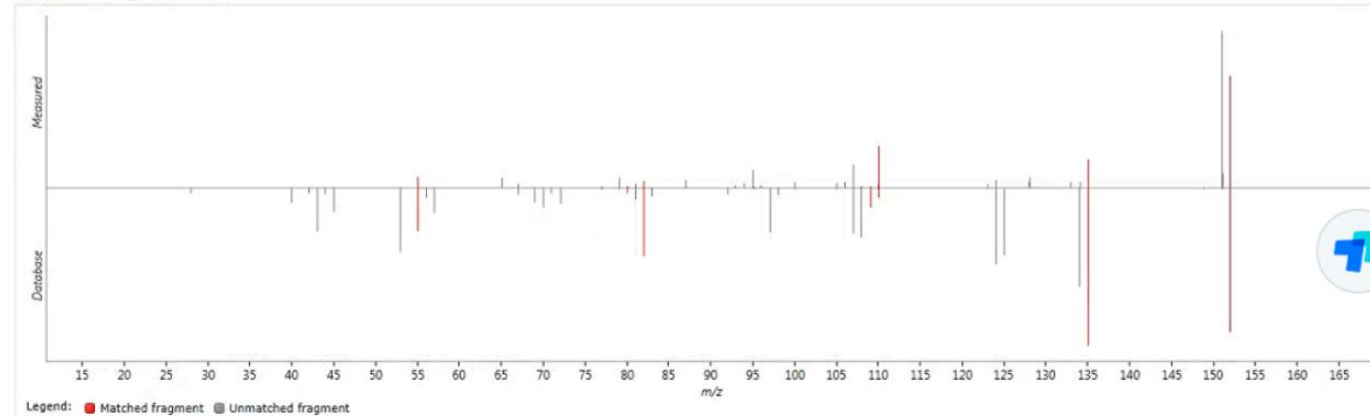

| Metabolite              | Compound       | Compound ID | Adducts   | Formula    | Score | Fragmentation Score |
|-------------------------|----------------|-------------|-----------|------------|-------|---------------------|
| Tyrosyl-Gamma-glutamate | 1.75_309.1332n | HMDB0029119 | M+H, M+Na | C14H19N3O5 | 43.3  | 26.7                |

Compound 1.75\_309.1332n

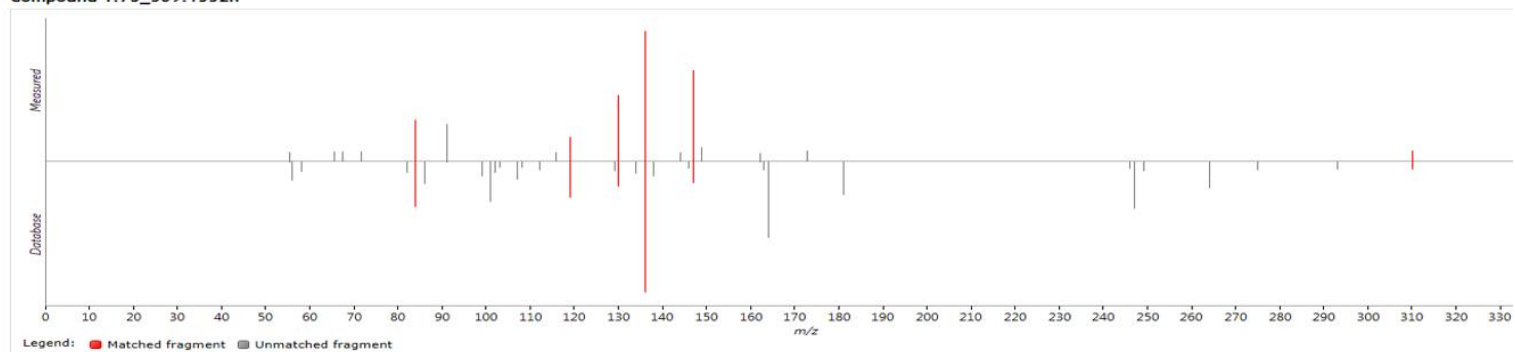

| Metabolite | Compound       | Compound ID | Adducts   | Formula    | Score | Fragmentation Score |
|------------|----------------|-------------|-----------|------------|-------|---------------------|
| Tyr Ser    | 1.60_268.1064n | METLIN23814 | M+H, M+Na | C12H16N2O5 | 49.6  | 56                  |

Compound 1.60\_268.1064n

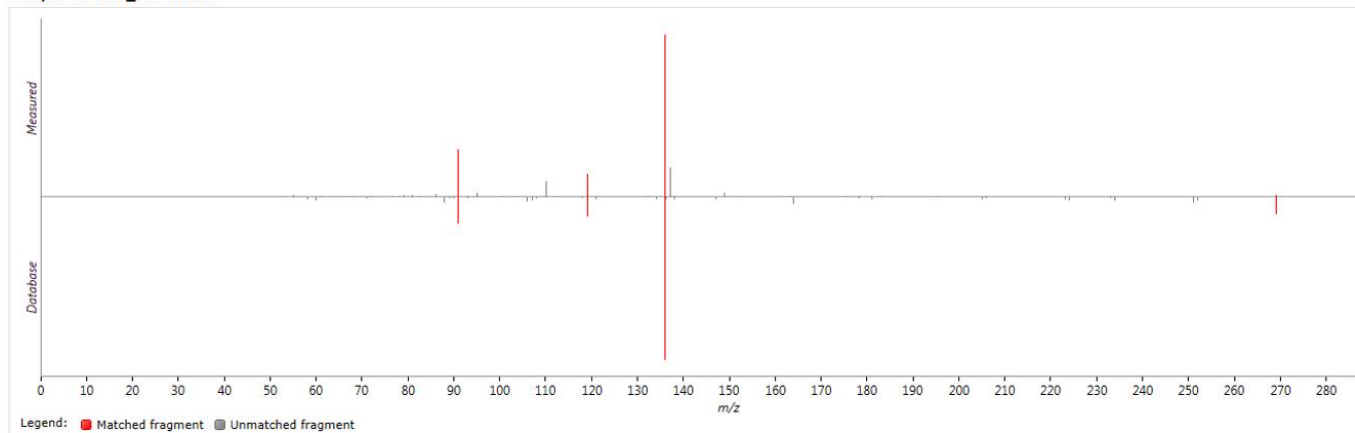

| Metabolite  | Compound       | Compound ID | Adducts                   | Formula                                         | Score | Fragmentation Score |
|-------------|----------------|-------------|---------------------------|-------------------------------------------------|-------|---------------------|
| Sphingosine | 4.22_299.2828n | HMDB0000252 | M+H-H <sub>2</sub> O, M+H | C <sub>18</sub> H <sub>37</sub> NO <sub>2</sub> | 51.5  | 63.1                |

Compound 4.22\_299.2828n

[Help](#)

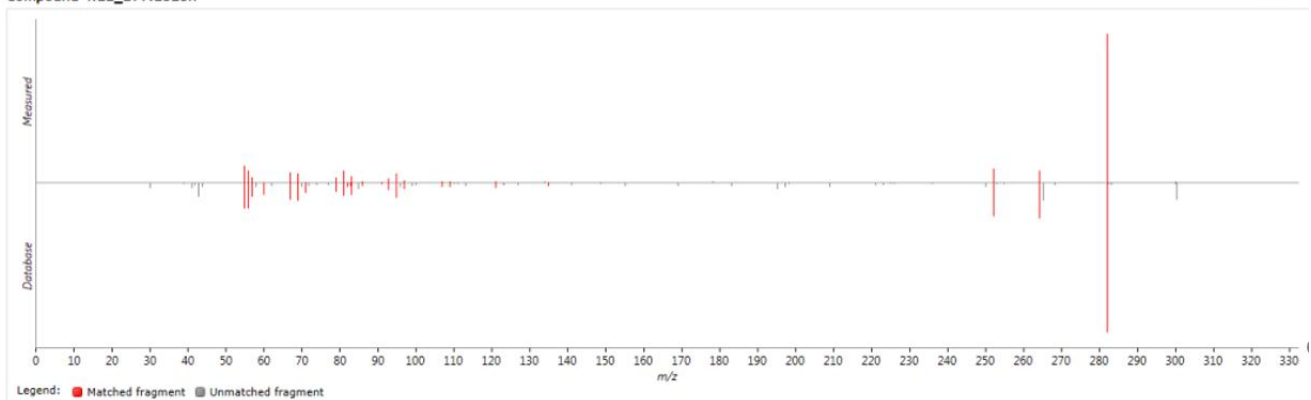



| Metabolite | Compound       | Compound ID | Adducts   | Formula                                                       | Score | Fragmentation Score |
|------------|----------------|-------------|-----------|---------------------------------------------------------------|-------|---------------------|
| Val Arg    | 0.94_273.1806n | METLIN23912 | M+H, M+Na | C <sub>11</sub> H <sub>23</sub> N <sub>5</sub> O <sub>3</sub> | 49.3  | 56                  |

Compound 0.94\_273.1806n

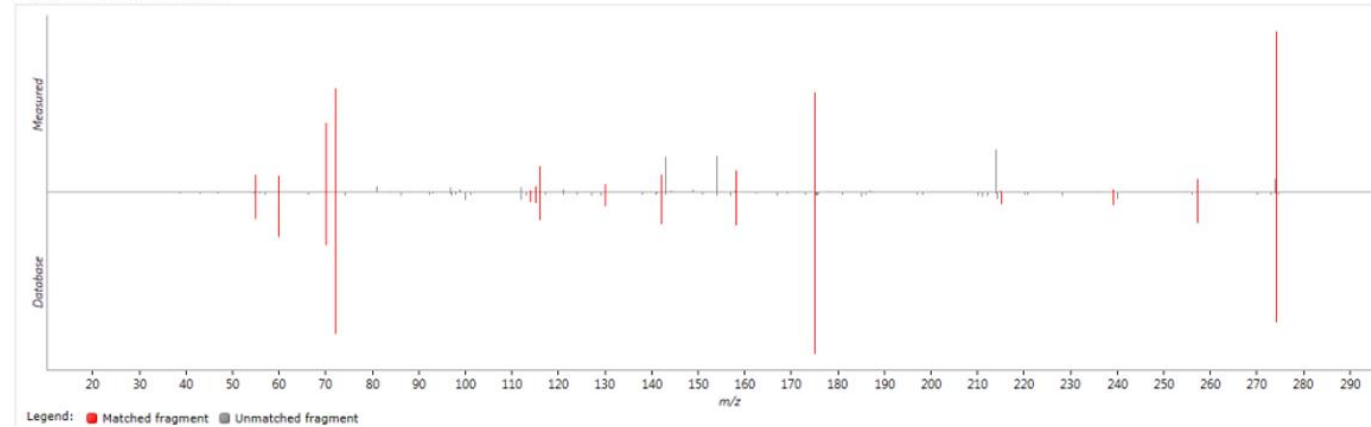

| Metabolite     | Compound         | Compound ID | Adducts              | Formula                                         | Score | Fragmentation Score |
|----------------|------------------|-------------|----------------------|-------------------------------------------------|-------|---------------------|
| Lyciumoside VI | 2.99_905.4851m/z | HMDB0033500 | M+H-H <sub>2</sub> O | C <sub>44</sub> H <sub>74</sub> O <sub>20</sub> | 44    | 48.4                |

Compound 2.99\_905.4851m/z

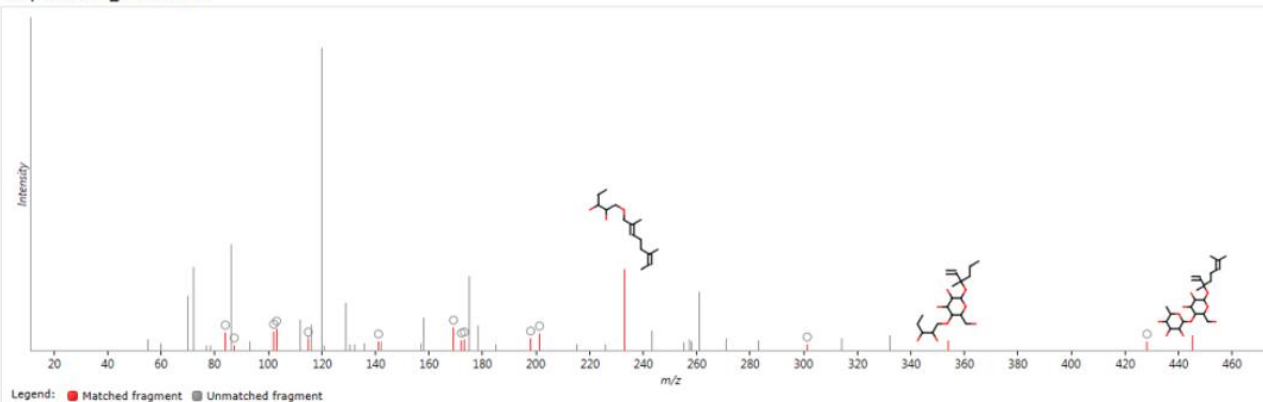

| Metabolite           | Compound         | Compound ID | Adducts | Formula                                                                         | Score | Fragmentation Score |
|----------------------|------------------|-------------|---------|---------------------------------------------------------------------------------|-------|---------------------|
| 3-Hydroxypimelyl-CoA | 3.03_943.2078m/z | HMDB0012155 | M+NH4   | C <sub>28</sub> H <sub>46</sub> N <sub>7</sub> O <sub>20</sub> P <sub>3</sub> S | 46    | 66.4                |

Compound 3.03\_943.2078m/z

[Help](#)

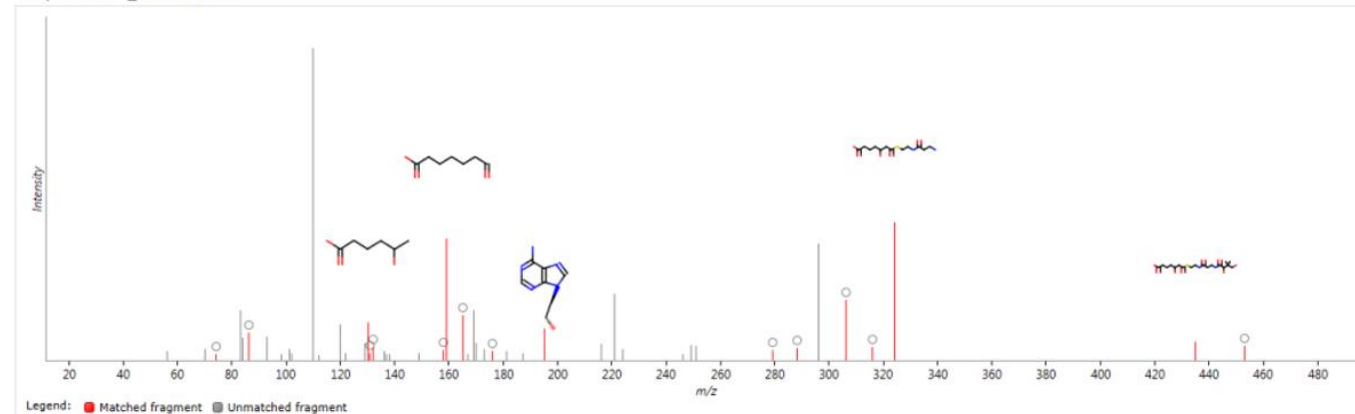

| Metabolite                  | Compound       | Compound ID | Adducts    | Formula                                         | Score | Fragmentation Score |
|-----------------------------|----------------|-------------|------------|-------------------------------------------------|-------|---------------------|
| N-Phenylacetylaspartic acid | 2.93_251.0804n | HMDB0029355 | M+H, M+NH4 | C <sub>12</sub> H <sub>13</sub> NO <sub>5</sub> | 45.1  | 34.5                |

Compound 2.93\_251.0804n

[Help](#)

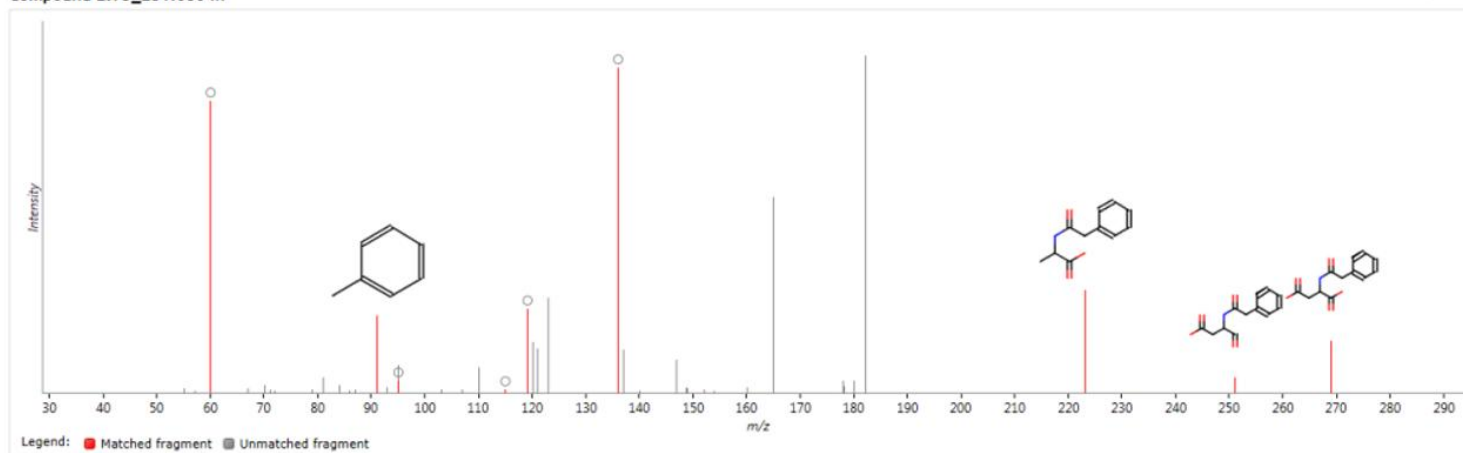

**Figure S5** Box plots of 6 typical differential metabolites: **(a)** Guanosine, **(b)** 2-Hydroxyadenine, **(c)** Lyciumoside VI, **(d)** 3-Hydroxypimelyl-CoA, **(e)** Val Arg; "\*\*\*"p < 0.001,"\*"p < 0.05.

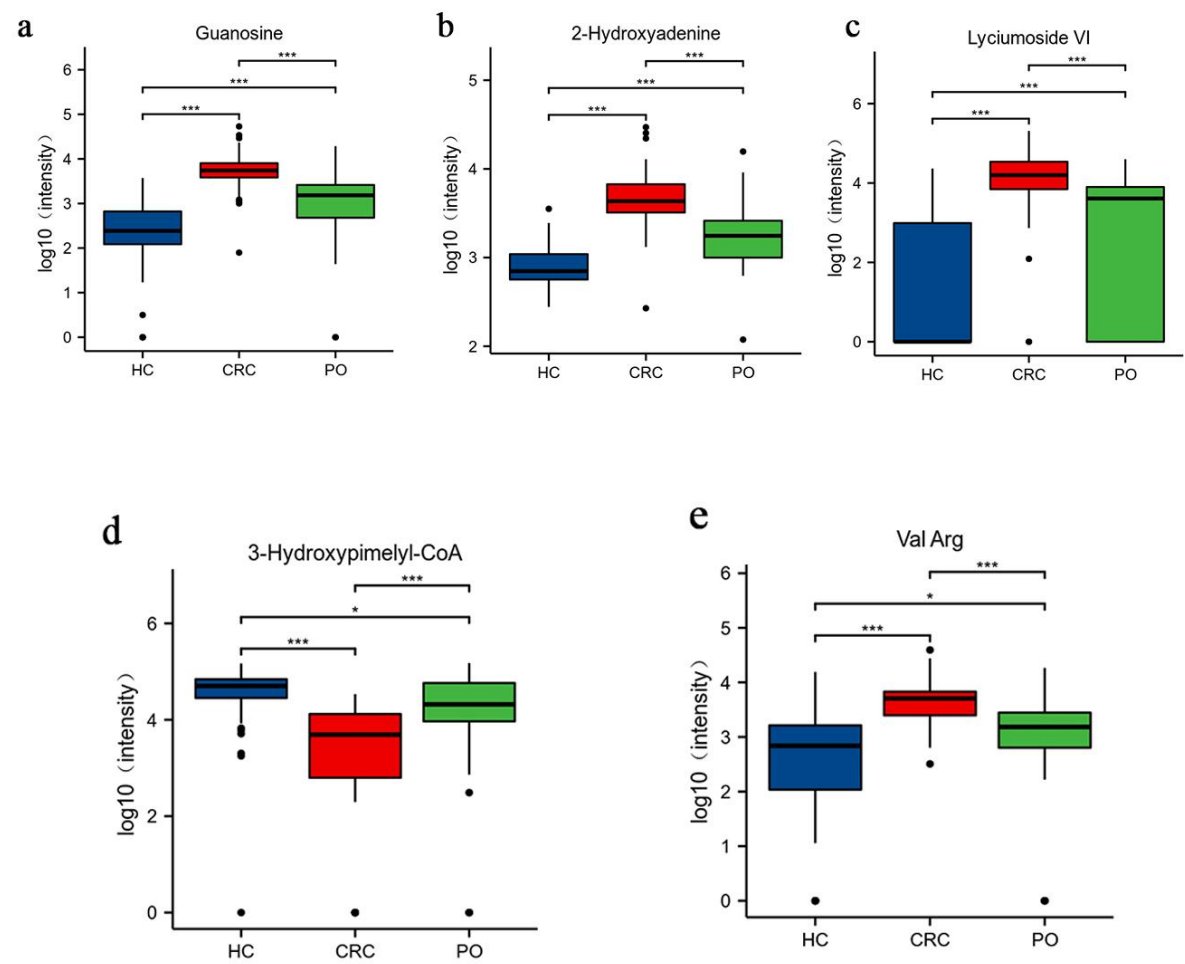

Supplement: Data_Sheet_1.PDF [file Data_Sheet_1.PDF]
